# Supplementary material for: Pain in patients with COPD: a systematic review and meta-analysis
Source: HighWire-hosted journal article supplement (doi:10.1136/bmjopen-2014-005898), 2014-09-01
Supplement: bmjopen-2014-005898supp.pdf [file bmjopen-2014-005898supp.pdf]

## **SUPPLEMENTARY FILE 1**

### **ELECTRONIC SEARCH SYSTEMATIC REVIEW PAIN IN PATIENTS WITH COPD**

#### **PUBMED:**

("Pain"[Mesh] OR "pain"[all fields] OR "pains"[all fields] OR "Pain Measurement"[Mesh] OR "Analgesics"[Mesh] OR "analgesic"[all fields]) AND ("Pulmonary Disease, Chronic Obstructive"[Majr] OR "chronic obstructive pulmonary disease"[tiab] OR COPD[tiab] OR "Lung Diseases, Obstructive"[Majr:NoExp] OR "chronic bronchitis"[tiab] OR "chronic obstructive airway disease"[tiab] OR "chronic airway obstruction"[tiab] OR "chronic airway obstructions"[tiab] OR "COAD"[tiab] OR "chronic airflow obstruction"[tiab] OR "chronic airflow obstructions"[tiab] OR "Pulmonary Emphysema"[Majr])

#### **EMBASE:**

(exp \*pain/ OR pain\*.ti,ab. OR exp \*pain assessment/ OR exp \*analgesia/ OR analgesic.ti,ab.) AND (exp \*chronic obstructive lung disease/ OR "chronic obstructive lung disease".ti. OR "chronic obstructive pulmonary disease".ti. OR COPD.ti. OR "obstructive lung disease\*".ti. OR "chronic bronchitis".ti. OR "chronic obstructive airway disease".ti. OR "chronic airway obstruction\*".ti. OR "COAD".ti. OR "chronic airflow obstruction\*".ti. OR exp \*lung emphysema/)

#### **CINAHL**

(MH "Pain+" OR TX pain\* OR MH "analgesia+" OR TX analgesic) AND (MM "Pulmonary Disease, Chronic Obstructive+" OR MM "Bronchitis, Chronic" OR TI "chronic obstructive pulmonary disease" OR TI COPD OR TI "obstructive lung disease\*" OR TI "chronic bronchitis" OR TI "chronic obstructive airway disease" OR TI "chronic airway obstruction\*" OR TI COAD OR TI "chronic airflow obstruction\*" OR MM emphysema)

## **PsycINFO**

(DE "Pain" OR DE "Aphagia" OR DE "Back Pain" OR DE "Chronic Pain" OR DE "Headache" OR DE "Myofascial Pain" OR DE "Neuralgia" OR DE "Neuropathic Pain" OR DE "Somatoform Pain Disorder" OR TX pain OR DE "Analgesia" OR TX analgesic) AND (DE "Chronic Obstructive Pulmonary Disease" OR DE "Bronchial Disorders" OR DE "Pulmonary Emphysema" OR TX "chronic obstructive pulmonary disease" OR TX COPD OR TX "obstructive lung disease" OR TX "chronic bronchitis" OR TX "chronic obstructive airway disease" OR TX "chronic airway obstruction" OR TX "chronic airway obstructions" OR TX COAD OR TX "chronic airflow obstruction" OR TX "chronic airflow obstructions" OR TX emphysema)
